# Supplementary material
Source: publisher site journal article supplement (https://www.dovepress.com/article/269033)
Supplement: Supplementary file 1 [file get_supplementary_file.php]

**Supplemental table S1:** Databases and search equations

| PUBMED | #1 All fields: (((e coli) OR e coli[MeSH Terms]))  #2 All fields: ((((infection, urinary tract[MeSH Terms]) OR urinary tract infection) OR urinary tract[MeSH Terms]) OR urinary tract))  #3 All fields: ((((((((((extended-spectrum beta-lactamase) OR esbl) OR beta-lactam resistance) OR beta lactam resistance[MeSH Terms]) OR beta lactam resistant) OR beta-lactamase) OR beta lactamase[MeSH Terms]) OR multidrug resistance) OR drug resistance, multiple[MeSH Terms]) OR multidrug resistant)  #4 #1 AND #2 AND #3 |
| --- | --- |
| COCHRANE | #1 Title, Abstract, Keywords: “escherichia coli” OR “e coli”  #2 Title, Abstract, Keywords: “urinary tract infection” OR “urinary tract”  #3 Title, Abstract, Keywords: “esbl” OR “beta-lactam resistance” OR “beta-lactam resistant” OR “beta-lactamase” OR “multidrug resistance” OR “multidrug resistant”  #4 #1 AND #2 AND #3 |
| EMBASE | (“escherichia coli”/exp OR “escherichia coli” OR “e coli”) AND (“urinary tract infection”/exp OR “urinary tract infection” OR “urinary tract”/exp OR “urinary tract”) AND (“extended-spectrum beta-lactamase”/exp OR “extended-spectrum beta-lactamase” OR “esbl” OR “esbl”/exp OR “esbl” OR “beta-lactam resistance”/exp OR “beta-lactam resistance” OR “beta-lactamase”/exp OR “beta-lactamase” OR “multidrug resistance”/exp OR “multidrug resistance”) |
| Web Of Science | TS=(e coli) AND TS=(urinary tract infection OR urinary tract) AND TS=(extended-spectrum beta-lactamase OR esbl OR beta-lactam resistance OR beta-lactam resistant OR beta-lactamase OR multidrug resistance OR multidrug resistant) |

**Appendix 1:**

**QUALITY ASSESSMENT BASED ON THE NEWCASTLE-OTTAWA SCALE**

**CASE-CONTROL STUDIES**

Note: A study can be assigned a maximum of one star for each numbered item within the Selection and Exposure categories. A maximum of two stars can be assigned for Comparability.

**Selection**

1) Is the case definition adequate?

a) yes, with independent validation

b) yes, e.g. recording of links or based on self-reports

c) no description

2) Representativeness of the cases

a) consecutive or obviously representative case series

b) potential selection biases or not specified

3) Selection of controls

a) community controls

b) hospital controls

c) no description

4) Definition of controls

a) no history of disease (endpoint)

b) no description of the source

**Comparability**

1) Comparability of cases and controls based on the design or analysis

a) study controls for _______________ (Select the most important factor)

b) study controls for any additional factor (This criterion could be modified to indicate a specific control for a second important factor.)

**Exposure**

1) Ascertainment of exposure

a) confirmed recording (e.g. surgical records)

b) structured interview blinded to case/control status

c) interview unblinded to case/control status

d) written self-report or medical record only

e) no description

2) Same method of ascertainment for cases and controls

a) yes

b) no

3) Non-response rate

a) same rate for both groups

b) non-responders described

c) different rate and no designation

**Appendix 2:**

**QUALITY ASSESSMENT BASE ON THE NEWCASTLE-OTTAWA SCALE (adapted for cross-sectional studies)**

**Selection:** (Maximum 5 stars)

1) Representativeness of the sample:

a) Truly representative of the average in the target population. * (all subjects or

random sample)

b) Somewhat representative of the average in the target population. * (non-

random sample)

c) Selected group of users.

d) No description of the sampling strategy.

2) Sample size:

a) Justified and satisfactory. *

b) Not justified.

3) Non-responders:

a) The comparability between the characteristics of responders and non-responders is established, and the response rate is satisfactory. *

b) The response rate is unsatisfactory, or the comparability between responders and non-responders is unsatisfactory.

c) No description of the response rate or characteristics of the responders and the non-responders.

4) Ascertainment of the exposure (risk factor):

a) Validated measurement tool. **

b) Non-validated measurement tool, but the tool is available or described.*

c) No description of the measurement tool.

**Comparability:** (Maximum 2 stars)

1) The subjects in the different groups are comparable, based on the study design or analysis. Confounding factors are controlled.

a) Study controls for the most important factor (select one). *

b) Study controls for any additional factor. *

**Outcome:** (Maximum 3 stars)

1) Assessment of the outcome:

a) Independent blinded assessment. **

b) Recording of links. **

c) Self-report. *

d) No description.

2) Statistical test:

a) The statistical test used to analyze the data is clearly described and appropriate, and the measurement of the association is presented, including confidence intervals and p values. *

b) The statistical test is not appropriate, not described or incomplete.

This scale was adapted from the Quality Assessment based on the Newcastle-Ottawa Scale for cohort studies to assess the quality of cross-sectional studies in systematic reviews, “Are Healthcare Workers’ Intentions to Vaccinate Related to their Knowledge, Beliefs and Attitudes? A Systematic Review”.

We did not select one factor that is the most important for comparability, because the variables were not the same in each study. Thus, the main factor should be identified for each study.

In our scale, we specifically assigned one star for self-reported outcomes, because our study assessed the intention to vaccinate. Two stars were assigned to studies assessing the outcome with independent blinded observers or with vaccination records, because these methods assessed the vaccination practice, resulting of a true intention.
